# Supplementary material for: Internet-based self-sampling for Chlamydia trachomatis testing: a national evaluation in Sweden
Source: PubMed Central journal article supplement — Sex Transm Infect. 2020 Jan 13;96(3):160–5. doi: 10.1136/sextrans-2019-054256 (PMC7231453; doi:10.1136/sextrans-2019-054256), 2020-01-13
Supplement: sextrans-2019-054256supp001.pdf [file sextrans-2019-054256supp001.pdf]

Supplementary information:  
Internet-based self-sampling for *Chlamydia trachomatis* testing: a national evaluation in Sweden; Söderqvist et al.

Supplementary table 1

Requested information about *C. trachomatis* testing for the years 2011 – 2017 in all clinical microbiology laboratories in 18 of 21 counties in Sweden. Data from 2011 – 2012 was excluded due to low quality. This was because of recent implementation of internet based self-sampling in some counties as well as unaccessible data due to changes in local laboratory information systems.

| 2015                                                         |     |     |           |       |     |             |                     |
|--------------------------------------------------------------|-----|-----|-----------|-------|-----|-------------|---------------------|
| Amount of analyzed samples from internet based self-sampling |     |     |           |       |     |             |                     |
|                                                              | Men |     |           | Women |     |             | Total men and women |
|                                                              | Pos | Neg | Total men | Pos   | Neg | Total women |                     |
| Age                                                          |     |     |           |       |     |             |                     |
| 15-19                                                        |     |     | 0         |       |     | 0           | 0                   |
| 20-24                                                        |     |     | 0         |       |     | 0           | 0                   |
| 25-29                                                        |     |     | 0         |       |     | 0           | 0                   |
| 30-34                                                        |     |     | 0         |       |     | 0           | 0                   |
| 35-44                                                        |     |     | 0         |       |     | 0           | 0                   |
| >44                                                          |     |     | 0         |       |     | 0           | 0                   |
| Total:                                                       | 0   |     | 0         | 0     |     | 0           | 0                   |
| Amount of analyzed samples from clinic based sampling        |     |     |           |       |     |             |                     |
|                                                              | Men |     |           | Women |     |             | Total men and women |
|                                                              | Pos | Neg | Total men | Pos   | Neg | Total women |                     |
| Age                                                          |     |     |           |       |     |             |                     |
| 15-19                                                        |     |     | 0         |       |     | 0           | 0                   |
| 20-24                                                        |     |     | 0         |       |     | 0           | 0                   |
| 25-29                                                        |     |     | 0         |       |     | 0           | 0                   |
| 30-34                                                        |     |     | 0         |       |     | 0           | 0                   |
| 35-44                                                        |     |     | 0         |       |     | 0           | 0                   |
| >44                                                          |     |     | 0         |       |     | 0           | 0                   |
| Total:                                                       | 0   |     | 0         | 0     |     | 0           | 0                   |
| Number of self-sample kits delivered                         |     |     |           |       |     |             |                     |
| Men:                                                         |     |     |           |       |     |             |                     |
| Women:                                                       |     |     |           |       |     |             |                     |
| Age:                                                         |     |     |           |       |     |             |                     |
| 15-19:                                                       |     |     |           |       |     |             |                     |
| 20-24:                                                       |     |     |           |       |     |             |                     |
| 25-29:                                                       |     |     |           |       |     |             |                     |
| 30-34:                                                       |     |     |           |       |     |             |                     |
| 35-44:                                                       |     |     |           |       |     |             |                     |
| >44:                                                         |     |     |           |       |     |             |                     |

Supplementary fig 1  
 Extended analysis of individual based data from four counties in 2013-2017

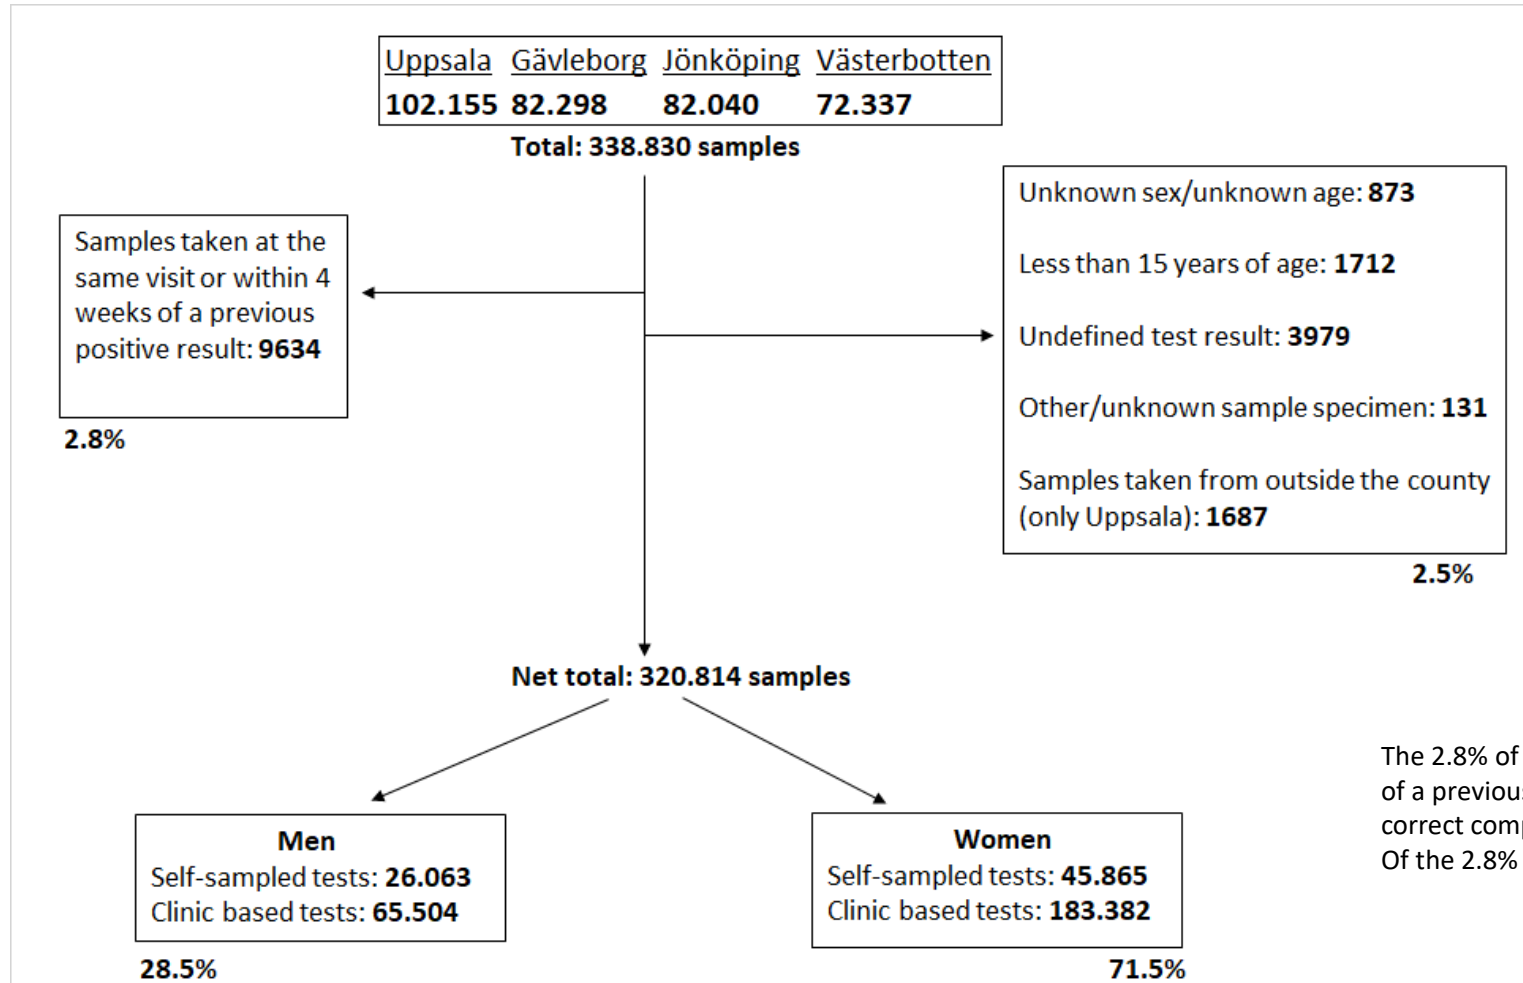

The 2.8% of samples taken at the same visit or within 4 weeks of a previous positive test result were excluded to enable a correct comparison between clinic based and self-sampling. Of the 2.8% only 0.3% were from self-sampling.

**Supplementary table 2. Distribution of self-collected and clinic based CT-tests in 14 counties 2013 - 2017**

|                                                           | Uppsala | Gävleborg | Jönköping | Väster-<br>botten | Söder-<br>manland | Dalarna <sup>a</sup> | Blekinge/<br>Kronoberg | Kalmar | Skåne  | Stockholm <sup>b</sup> | Väst-<br>manland | Västra<br>Götaland <sup>c</sup> | Örebro | Total   | Range     |
|-----------------------------------------------------------|---------|-----------|-----------|-------------------|-------------------|----------------------|------------------------|--------|--------|------------------------|------------------|---------------------------------|--------|---------|-----------|
| No. self-collected samples                                | 18462   | 17868     | 16914     | 19177             | 13848             | 9094                 | 17287                  | 10686  | 69919  | 100528                 | 8875             | 84091                           | 17186  | 403935  |           |
| No. clinic based samples                                  | 82916   | 63623     | 57278     | 52194             | 81815             | 68687                | 53110                  | 46201  | 414468 | 798186                 | 42382            | 418504                          | 72539  | 2251903 |           |
| Total no. of samples per 1000<br>inhabit aged 15-44 years | 685     | 838       | 567       | 693               | 950               | 807                  | 548                    | 695    | 941    | 946                    | 528              | 773                             | 809    | 828     | 528-950   |
| Men/women (%)                                             |         |           |           |                   |                   |                      |                        |        |        |                        |                  |                                 |        |         |           |
| self-collected                                            | 35/65   | 36/64     | 39/61     | 35/65             | 37/63             | 36/64                | 37/63                  | 31/69  | 36/64  | 35/65                  | 37/63            | 37/63                           | 32/68  | 36/64   | 31-39     |
| clinic based                                              | 31/69   | 24/76     | 25/75     | 29/71             | 23/77             | 26/74                | 27/73                  | 25/75  | 25/75  | 36/64                  | 30/70            | 27/73                           | 27/73  | 30/70   | 23-36     |
| Proportion 15-29 years of all<br>tested (%)               |         |           |           |                   |                   |                      |                        |        |        |                        |                  |                                 |        |         |           |
| self-collected                                            | 76.1    | 74.8      | 78.5      | 78.5              | 73.1              | 70.3                 | 78.4                   | 82.0   | 72.5   | 67.8                   | 68.0             | 75.9                            | 77.6   | 73.4    | 67.8-82.0 |
| clinic based                                              | 74.6    | 73.3      | 72.4      | 76.4              | ND                | 71.7                 | 76.7                   | 75.1   | 66.2   | ND                     | 68.4             | ND                              | 69.6   | 70.1    | 66.2-76.7 |
| Men CT-positive (%)                                       |         |           |           |                   |                   |                      |                        |        |        |                        |                  |                                 |        |         |           |
| self-collected                                            | 7.1     | 8.2       | 10.1      | 6.9               | 10.7              | 8.5                  | 7.8                    | 8.9    | 6.5    | 7.5                    | 10.3             | 8.4                             | 7.4    | 7.9     | 6.5-10.7  |
| clinic based                                              | 8.8     | 11.7      | 11.5      | 9.6               | 10.9              | 9.4                  | 10.6                   | 10.8   | 7.5    | 6.8                    | 12.9             | 9.8                             | 9.3    | 8.3     | 6.8-12.9  |
| Women CT-positive (%)                                     |         |           |           |                   |                   |                      |                        |        |        |                        |                  |                                 |        |         |           |
| self-collected                                            | 4.8     | 4.9       | 6.1       | 4.4               | 7.4               | 5.4                  | 5.6                    | 5.5    | 4.2    | 4.5                    | 8.4              | 5.3                             | 4.8    | 5.0     | 4.2-8.4   |
| clinic based                                              | 5.6     | 5.2       | 5.2       | 5.5               | 4.9               | 4.5                  | 5.5                    | 4.8    | 3.6    | 4.7                    | 7.5              | 4.9                             | 4.9    | 4.7     | 3.6-7.5   |

<sup>a</sup> Missing data on clinic based tests for 2013, approximately 500 samples (0.7% of clinic based tests).

<sup>b</sup> Missing data on clinic based tests from one laboratory accounting for 124,841 test (13.5% of clinic-based tests).

<sup>c</sup> Missing data on clinic based tests from one laboratory accounting for 72,484 test (1.5% of clinic-based tests).

ND: Not determined due to missing data on age.

Counties in blue were included in extended analysis of individual testing patterns.

**Supplementary table 3 Analysis of self-sampling at home and clinic based CT-testing in 14 counties between 2013 and 2017**

|                  |       | Self-sampled tests |                       |                       |                                | Clinic based tests |                       |                       |                                | All tests    |                       |                       |                                |
|------------------|-------|--------------------|-----------------------|-----------------------|--------------------------------|--------------------|-----------------------|-----------------------|--------------------------------|--------------|-----------------------|-----------------------|--------------------------------|
|                  |       | No. of tests       | Per cent <sup>a</sup> | No. of positive tests | Per cent positive <sup>b</sup> | No. of tests       | Per cent <sup>a</sup> | No. of positive tests | Per cent positive <sup>b</sup> | No. of tests | Per cent <sup>a</sup> | No. of positive tests | Per cent positive <sup>b</sup> |
| <b>Gender</b>    |       |                    |                       |                       |                                |                    |                       |                       |                                |              |                       |                       |                                |
| Men              | mean  | 11148              | 35.7                  | 879                   | 7.9                            | 51571              | 27.3                  | 4280                  | 8.3                            | 62719        | 28.9                  | 5158                  | 8.2                            |
|                  | range | 3244-35213         | 31.0-38.8             | 277-2651              | 6.5-10.7                       | 11627-288674       | 23.5-36.2             | 1251-19586            | 6.8-12.9                       | 14935-323887 | 25.5-36.0             | 1545-22237            | 6.9-12.3                       |
| Women            | mean  | 19924              | 64.3                  | 996                   | 5.0                            | 121652             | 72.7                  | 5712                  | 4.7                            | 141577       | 71.1                  | 6708                  | 4.7                            |
|                  | range | 5631-65315         | 61.2-69.0             | 316-2917              | 4.2-8.4                        | 29769-509512       | 63.8-76.5             | 1664-24106            | 3.6-7.5                        | 35400-574827 | 64.0-74.5             | 2072-27023            | 3.7-7.6                        |
| Total            | mean  | 31072              |                       | 1875                  | 6.0                            | 173223             |                       | 9991                  | 5.8                            | 204295       |                       | 11866                 | 5.8                            |
|                  | range | 8875-100528        |                       | 593-5568              | 5.0-9.1                        | 42382-798186       |                       | 2915-43692            | 4.6-9.1                        | 51257-898714 |                       | 3617-49260            | 4.6-9.1                        |
| <b>Age group</b> |       |                    |                       |                       |                                |                    |                       |                       |                                |              |                       |                       |                                |
| 15-19            | mean  | 1418               | 5.5                   | 140                   | 9.8                            | 18138              | 20.8                  | 1424                  | 7.8                            | 19123        | 17.8                  | 1511                  | 7.9                            |
|                  | range | 250-5153           | 1.9-11.4              | 29-555                | 7.4-13.3                       | 6830-67054         | 16.1-24.7             | 729-4664              | 7.0-11.4                       | 7080-68998   | 13.8-22.5             | 807-4837              | 7.0-11.5                       |
| 20-24            | mean  | 11358              | 39.5                  | 824                   | 7.3                            | 30120              | 33.2                  | 2323                  | 7.7                            | 38401        | 34.7                  | 2893                  | 7.6                            |
|                  | range | 2836-31743         | 27.4-47.9             | 260-2488              | 5.9-11.6                       | 13876-120528       | 29.1-37.8             | 1295-7800             | 6.5-12.0                       | 16712-146512 | 30.2-39.3             | 1673-9326             | 6.4-11.9                       |
| 25-29            | mean  | 546                | 29.8                  | 546                   | 5.4                            | 18574              | 18.5                  | 921                   | 5.1                            | 24762        | 20.6                  | 1255                  | 5.2                            |
|                  | range | 147-1937           | 25.1-38.0             | 147-1937              | 4.3-8.4                        | 7503-86709         | 16.2-22.5             | 405-3281              | 3.8-8.9                        | 10212-109505 | 18.0-24.6             | 552-4356              | 4.0-8.7                        |
| ≥30              | mean  | 8254               | 25.1                  | 365                   | 4.4                            | 28508              | 27.6                  | 824                   | 3.2                            | 33601        | 26.9                  | 1048                  | 3.4                            |
|                  | range | 1925-32397         | 18.0-32.2             | 95-1373               | 3.5-7.1                        | 11505-140177       | 23.3-33.8             | 339-3223              | 2.3-5.0                        | 13430-159372 | 22.9-32.9             | 434-3977              | 2.5-5.4                        |
| All ages         | mean  | 31072              |                       | 1875                  | 6.0                            | 173223             |                       | 9991                  | 5.8                            | 204295       |                       | 11866                 | 5.8                            |
|                  | range | 8875-100528        |                       | 593-5568              | 5.0-9.1                        | 42382-798186       |                       | 2915-43692            | 4.6-9.1                        | 51257-898714 |                       | 3617-49260            | 4.6-9.1                        |

<sup>a</sup> mean: based on 14 values from the counties; <sup>b</sup> mean: value from total mean of data from 14 counties
